# Supplementary material
Source: publisher figshare collection journal article supplement (https://acs.figshare.com/ndownloader/files/29006999)
Supplement: Supplementary file 1 [file 29006999]

## Supporting Information

### **Hierarchical Porous Catalytic Pyrolysis Char Derived from Oily Sludge for Enhanced Adsorption**

Dong Han<sup>a, b</sup>, Xiaoyu Li<sup>a\*, b</sup>, Zhiqiang Gong<sup>c</sup>, Lanyue Jiang<sup>a</sup>, Zhenbo Wang<sup>b\*</sup>, Peikun Liu<sup>a</sup>

<sup>a</sup> College of Mechanical and Electronic Engineering, Shandong University of Science and Technology, Qingdao 266590, China. E-mail address: [lixu2018@sdust.edu.cn](mailto:lixu2018@sdust.edu.cn).

<sup>b</sup> College of New Energy, China University of Petroleum(East China), Qingdao 266580, China. E-mail address: [dxl437@sina.com](mailto:dxl437@sina.com).

<sup>c</sup> State Grid Shandong Electric Power Research Institute, Jinan 250003, China.

## Explanations and formulas for isotherm models

The Langmuir model assumes that the adsorbent surface is homogeneous, and the adsorption energy is the same on the surface. The adsorption is monolayer adsorption. When the adsorption equilibrium reached, the number of molecules entering the adsorption site is equal to the number of molecules leaving in unit time, in other words, the adsorption rate is equal to the desorption rate [1]. The linear formula of the Langmuir model is expressed as follows:

$$\frac{c_e}{q_e} = \frac{1}{q_m K_L} + \frac{c_e}{q_m}$$

Where,  $q_e$  is the equilibrium adsorption capacity (mg/g),  $c_e$  is the equilibrium concentration of the dye solution (mg/L),  $q_m$  is the saturated adsorption capacity (mg/g) and  $K_L$  is the Langmuir constant (L/mg).

The dimensionless constant  $R_L$  normally known as separation factor expressed as follows:

$$R_L = \frac{1}{1 + K_L c_e}$$

When  $R_L > 1$ ,  $R_L = 1$ ,  $0 < R_L < 1$ , and  $R_L = 0$ , the adsorption process is predicted to be non-favorable, linear, favorable and non-reversible, respectively [2].

The Freundlich model is an empirical formula without any assumptions, because the constants in the formula have no definite physical meaning [3]. The linear formula of

Freundlich model is shown as follows:

$$\ln q_e = \ln K_F + \frac{1}{n} \ln c_e$$

Where,  $K_F$  is the Freundlich constant  $[(\text{mg/g})(\text{L/mg})^{1/n}]$  related to the adsorption interaction and the adsorption capacity,  $n$  is a constant related to the adsorption intensity.

### **Explanations and formulas for kinetic models:**

The linear formula of Pseudo-first-order model is shown as follows:

$$\ln(q_{e.\text{exp}} - q_t) = \ln q_{e.\text{cal}} - k_1 t$$

Where,  $q_{e.\text{exp}}$  is the experimental equilibrium adsorption capacity (mg/g),  $q_{e.\text{cal}}$  is the calculated equilibrium adsorption capacity (mg/g),  $q_t$  is the adsorption capacity at time  $t$  (mg/g),  $k_1$  is the Pseudo-first-order rate constant ( $\text{min}^{-1}$ ),  $t$  is the pre-set time intervals (min).

The linear formula of Pseudo-second-order model is shown as follows:

$$\frac{t}{q_t} = \frac{1}{k_2 q_{e.\text{cal}}^2} + \frac{1}{q_{e.\text{cal}}} t$$

Where,  $k_2$  is the Pseudo-second-order rate constant ( $\text{g mg}^{-1}\text{min}^{-1}$ ).

**Table S1** Characteristics of the OS used in this paper.

| Ultimate analysis  |          |                 |      |       |              |       |
|--------------------|----------|-----------------|------|-------|--------------|-------|
| element            | C        | H               | O    | N     | S            | Si    |
| wt%                | 16.38    | 4.25            | 8.91 | 0.32  | 2.34         | 20.47 |
| Proximate analysis |          |                 |      |       |              |       |
| component          | moisture | Volatile matter |      | ash   | fixed carbon |       |
| wt%                | 16.61    | 27.38           |      | 51.19 | 4.82         |       |

**Table S2** Fit summary of sequential model.

| Sequential Model Sum of Squares |                |                |                               |                                |            |           |
|---------------------------------|----------------|----------------|-------------------------------|--------------------------------|------------|-----------|
| Source                          | Sum of squares | DF             | Mean square                   | F-value                        | Prob>F     |           |
| Mean vs Total                   | 7.337E+005     | 1              | 7.337E+005                    |                                |            |           |
| Linear vs Mean                  | 4707.93        | 3              | 1569.31                       | 0.30                           | 0.8268     |           |
| 2FI vs Linear                   | 3460.47        | 3              | 1153.49                       | 0.18                           | 0.9096     |           |
| Quadratic vs 2FI                | 65138.26       | 3              | 21712.75                      | 2798.24                        | <0.0001    | Suggested |
| Cubic vs Quadratic              | 10.76          | 3              | 3.59                          | 0.33                           | 0.8058     | Aliased   |
| Residual                        | 43.56          | 4              | 10.89                         |                                |            |           |
| Total                           | 8.071E+005     | 17             | 47476.00                      |                                |            |           |
| Lack of Fit tests               |                |                |                               |                                |            |           |
| Linear                          | 68609.49       | 9              | 7623.28                       | 700.08                         | <0.0001    |           |
| 2FI                             | 65149.02       | 6              | 10858.17                      | 997.16                         | <0.0001    |           |
| Quadratic                       | 10.76          | 3              | 3.59                          | 0.33                           | 0.8058     | Suggested |
| Cubic                           | 0.000          | 0              |                               |                                |            | Aliased   |
| Pure Error                      | 43.56          | 4              | 10.89                         |                                |            |           |
| Model Summary Statistics        |                |                |                               |                                |            |           |
| source                          | Std. Dev.      | R <sup>2</sup> | R <sup>2</sup> <sub>Adj</sub> | R <sup>2</sup> <sub>Pred</sub> | PRESS      |           |
| Linear                          | 72.67          | 0.0642         | -0.1518                       | -0.3689                        | 1.004E+005 |           |
| 2FI                             | 80.74          | 0.1113         | -0.4218                       | -1.1132                        | 1.550E+005 |           |
| Quadratic                       | 2.79           | 0.9993         | 0.9983                        | 0.9967                         | 240.21     | Suggested |
| Cubic                           | 3.30           | 0.9994         | 0.9976                        |                                |            | Aliased   |

**Table S3** Analysis of variance (ANOVA) of the experimental results of RSM-BBD.

| Source               | Sum of squares | DF | Mean square | F-value | Prob>F  |                        |
|----------------------|----------------|----|-------------|---------|---------|------------------------|
| <b>Model</b>         | 73306.66       | 9  | 8145.18     | 1049.72 | <0.0001 | <b>significant</b>     |
| <b>A</b>             | 2778.14        | 1  | 2778.14     | 358.03  | <0.0001 |                        |
| <b>B</b>             | 1454.36        | 1  | 1454.36     | 187.43  | <0.0001 |                        |
| <b>C</b>             | 475.43         | 1  | 475.43      | 61.27   | 0.0001  |                        |
| <b>AB</b>            | 308.79         | 1  | 308.79      | 39.80   | 0.0004  |                        |
| <b>AC</b>            | 3149.79        | 1  | 3149.79     | 405.93  | <0.0001 |                        |
| <b>BC</b>            | 1.89           | 1  | 1.89        | 0.24    | 0.6372  |                        |
| <b>A<sup>2</sup></b> | 29270.40       | 1  | 29270.40    | 3772.24 | <0.0001 |                        |
| <b>B<sup>2</sup></b> | 13766.04       | 1  | 13766.04    | 1774.11 | <0.0001 |                        |
| <b>C<sup>2</sup></b> | 15500.73       | 1  | 15500.73    | 1997.66 | <0.0001 |                        |
| <b>Residual</b>      | 54.32          | 7  | 7.76        |         |         |                        |
| <b>Lack of Fit</b>   | 10.76          | 3  | 3.59        | 0.33    | 0.8058  | <b>not significant</b> |
| <b>Pure Error</b>    | 43.56          | 4  | 10.89       |         |         |                        |
| <b>Cor Total</b>     | 73360.97       | 16 |             |         |         |                        |

**Table S4** Statistical analysis for the quadratic model.

| Statics                             | Value  |
|-------------------------------------|--------|
| Determination coefficient           | 0.9993 |
| Adjusted determination coefficient  | 0.9983 |
| Predicted determination coefficient | 0.9967 |
| Coefficient of variation (CV, %)    | 1.34   |
| Adequate precision                  | 92.892 |

**Table S5**

Adsorption isotherm parameters for MB adsorbed onto PC at different temperature.

| Temperature (K)           |       |                             | 298         | 308         | 318         |
|---------------------------|-------|-----------------------------|-------------|-------------|-------------|
| Experimental $q_e$ (mg/g) |       |                             | 282.69      | 305.51      | 322.89      |
| <b>Langmuir</b>           | $q_m$ | mg/g                        | 285.71      | 304.88      | 327.87      |
|                           | $K_L$ | L/mg                        | 0.4094      | 0.3388      | 0.2032      |
|                           | $R_L$ |                             | 0.003~0.789 | 0.003~0.850 | 0.007~0.960 |
|                           | $R^2$ |                             | 0.9999      | 0.9999      | 0.9997      |
| <b>Freundlich</b>         | $K_F$ | (mg/g)(L/mg) <sup>1/n</sup> | 178.95      | 183.06      | 193.37      |
|                           | $1/n$ |                             | 0.0844      | 0.0897      | 0.0905      |
|                           | $R^2$ |                             | 0.5635      | 0.6255      | 0.7153      |

**Table S6**

Adsorption kinetic parameters for MB adsorbed onto PC at different temperature.

| Temperature (K)                 |             |                                      | 298    | 308    | 318    |
|---------------------------------|-------------|--------------------------------------|--------|--------|--------|
| Experimental $q_{e.exp}$ (mg/g) |             |                                      | 282.69 | 305.51 | 322.89 |
| <b>Pseudo-first-order</b>       | $q_{e.cal}$ | mg/g                                 | 275.03 | 299.62 | 308.34 |
|                                 | $k_1$       | min <sup>-1</sup>                    | 5.0817 | 5.5723 | 5.1104 |
|                                 | $R^2$       |                                      | 0.9948 | 0.9972 | 0.9941 |
| <b>Pseudo-second-order</b>      | $q_{e.cal}$ | mg/g                                 | 281.69 | 304.88 | 317.46 |
|                                 | $k_2$       | g mg <sup>-1</sup> min <sup>-1</sup> | 0.027  | 0.033  | 0.015  |
|                                 | $R^2$       |                                      | 0.9999 | 0.9999 | 0.9999 |

**Table S7**

Comparison of the MB adsorption capacity of various adsorbents

| Adsorbents                                           | adsorption capacity<br>(mg g <sup>-1</sup> ) | Reference        |
|------------------------------------------------------|----------------------------------------------|------------------|
| <b>Oily sludge-based PC</b>                          | <b>322.89</b>                                | <b>This work</b> |
| Nanoporous polymer                                   | 57.74                                        | [4]              |
| Hollow spherical sludge carbon                       | 149                                          | [5]              |
| Cellulose nanocrystal-alginate<br>hydrogel           | 256.41                                       | [6]              |
| <i>Prosopis juliflora</i> -based<br>activated carbon | 91                                           | [7]              |
| Corn stalk-based activated<br>carbon                 | 144                                          | [8]              |
| Eucalyptus sawdust-based<br>activated carbon         | 178.57                                       | [9]              |
| Chitosan-clay composite                              | 193.23                                       | [10]             |
| Wheat straw-based activated<br>carbon                | 208                                          | [11]             |
| Wheat straw-based activated<br>carbon                | 396.9                                        | [12]             |

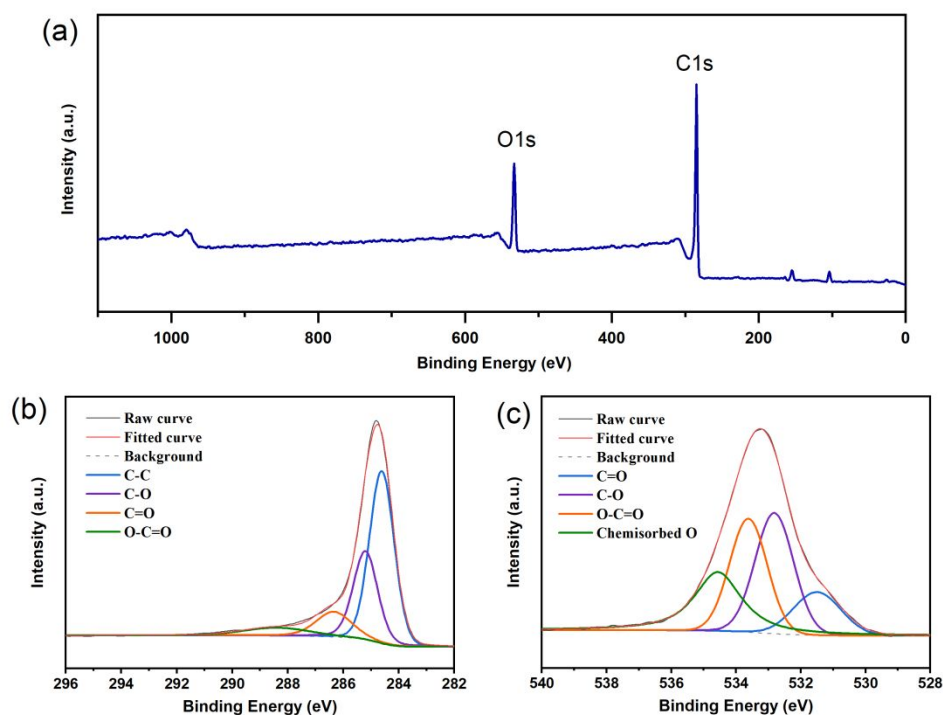

**Figure S1.** The XPS survey (a) and the high resolution of C1s (b) and O1s(c) spectrum of PC

As shown in Figure S1a, C1s, and O1s peaks can be observed clearly in the XPS survey. The high resolution C1s and O1s XPS spectra of PC are shown in Figure S1b and c, respectively. The C1s spectrum can be deconvoluted into four peaks which representing C-C (284.5 eV), C-O (285.7eV), C=O (287.3 eV) and C-C (288.7 eV), respectively [13]. The O1s spectrum can also be divided into four peaks which attributing to C=O (531.4 eV), C-O (532.3 eV), O-C=O (533.5 eV) and chemisorbed Oxygen (534.8 eV), respectively [14]. These O-containing functional group especially hydroxyl and carboxyl groups could generate electrostatic interactions and hydrogen bonding effect with MB ions, which promotes the adsorption performance of PC material.



## Reference S

- [1] S. P. D. Monte Blanco et al., Kinetic, equilibrium and thermodynamic phenomenological modeling of reactive dye adsorption onto polymeric adsorbent, *Chem. Eng. J.*, **2017**, 307, 466-475.
- [2] M. Iwan, B. Chao, Q. Lian, R. Subramaniam, M. Zappi, and D. Dianchen, Equilibrium, kinetic and thermodynamic studies for adsorption of BTEX onto Ordered Mesoporous Carbon ( OMC ), *J. Hazard. Mater.*, **2017**, 336, 249-259.
- [3] S. Xu, Y. Lv, X. Zeng, and D. Cao, ZIF-derived nitrogen-doped porous carbons as highly efficient adsorbents for removal of organic compounds from wastewater, *Chem. Eng. J.*, **2017**, 323, 502-511.
- [4] H. Su, W. Li, Y. Han, N. Liu, Magnetic carboxyl functional nanoporous polymer: synthesis, characterization and its application for methylene blue adsorption, *Sci. Rep.*, **2018**, 8, 6506.
- [5] Z.J. Wu, L.J. Kong, H. Hu, S.H. Tian, Y. Xiong, Adsorption Performance of Hollow Spherical Sludge Carbon Prepared from Sewage Sludge and Polystyrene Foam Wastes, *ACS Sustainable Chem. Eng.*, **2015**, 3, 552-558.
- [6] N. Mohammed, N. Grishkewich, R. Berry, K. Tam, Cellulose nanocrystal-alginate hydrogel beads as novel adsorbents for organic dyes in aqueous solutions, *Cellulose*, **2015**, 22, 3725-3738.

- [7] V. Nair, R. Vinu, Peroxide-assisted microwave activation of pyrolysis char for adsorption of dyes from wastewater, *Bioresour. Technol.*, **2016**, *216*, 511-519.
- [8] Y.L. Li, Y.L. Li, L.P. Li, X.J. Shi, Z. Wang, Preparation and analysis of activated carbon from sewage sludge and corn stalk, *Adv Powder Technol*, **2016**, *27*, 684-691.
- [9] L. Sun, D.M. Chen, S.G. Wan, Z.B. Yu, Performance, kinetics, and equilibrium of methylene blue adsorption on biochar derived from eucalyptus saw dust modified with citric, tartaric, and acetic acids, *Bioresour. Technol.*, **2015**, *198*, 300-308.
- [10] M. Auta, B.H. Hameed, Chitosan-clay composite as highly effective and low-cost adsorbent for batch and fixed-bed adsorption of methylene blue, *Chem Eng J*, **2014**, *237*, 352-361.
- [11] X.Y. Han, L. Chu, S.M. Liu, T.M. Chen, C. Ding, J.L. Yan, L.Q. Cui, G.X. Quan, Removal of Methylene Blue from Aqueous Solution using Porous Biochar Obtained by KOH Activation of Peanut Shell Biochar, *Bioresources*, **2015**, *10*, 2836-2849.
- [12] R.P. Han, L.J. Zhang, C. Song, M.M. Zhang, H.M. Zhu, L.J. Zhang, Characterization of modified wheat straw, kinetic and equilibrium study about copper ion and methylene blue adsorption in batch mode, *Carbohydr Polym*, **2010**, *79*, 1140-1149.
- [13] A.Y. Wang, K. Sun, L.P. Wu, P. Wu, W.C. Zeng, Z.M. Tian, Q.X. Huang, Co-carbonization of biomass and oily sludge to prepare sulfamethoxazole super-adsorbent materials, *Sci. Total Environ.*, **2020**, *698*, 134238.
- [14] J.H. Zhou, Z.J. Sui, J. Zhu, P. Li, D. Chen, Y.C. Dai, W.K. Yuan, Characterization of

surface oxygen complexes on carbon nanofibers by TPD, XPS and FT-IR, *Carbon*, **2007**,  
45, 785–796
